# Supplementary material
Source: MDPI journal article supplement (https://www.mdpi.com/2254-9625/14/5/93)
Supplement: s1 [file s1]

## Supplementary File S2: Tables and Graphs.

**Table S1. Evaluation of ChatGPT-4 answers to written and verbal questions**

|                                          | Verbal (N=242)     | Written (N=242)     | Difference (N=242)    | P value          |
|------------------------------------------|--------------------|---------------------|-----------------------|------------------|
| Knowledge Gap                            |                    |                     |                       | 0.095            |
| Successfully answered question           | 186 (76.9%)        | 195 (80.6%)         | 7 (3.8%)              |                  |
| Was not able to understand               | 56 (23.1%)         | 47 (19.4%)          | 16 (28.6%)            |                  |
| Misinterpret                             |                    |                     |                       | 0.29             |
| No                                       | 235 (97.1%)        | 231 (95.5%)         | 6 (2.6%)              |                  |
| Yes                                      | 7 (2.9%)           | 11 (4.5%)           | 2 (28.6%)             |                  |
| Require.add.context                      |                    |                     |                       | 0.052            |
| No                                       | 200 (82.6%)        | 209 (86.4%)         | 4 (2.0%)              |                  |
| Yes                                      | 42 (17.4%)         | 33 (13.6%)          | 13 (31.0%)            |                  |
| Redirected                               |                    |                     |                       | 1.00             |
| No                                       | 240 (99.2%)        | 239 (98.8%)         | 3 (1.2%)              |                  |
| Yes                                      | 2 (0.8%)           | 3 (1.2%)            | 2 (100.0%)            |                  |
| Flesch-Kincaid Grade Level:              |                    |                     |                       | <b>&lt;0.001</b> |
| Median (Range)                           | 8.8 (2.1, 18.1)    | 10.9 (4.9, 18.3)    | 2.0 (-5.4, 10.3)      |                  |
| Mean (SD)                                | 8.8 (2.0)          | 10.8 (2.2)          | 2.0 (2.6)             |                  |
| Flesch-Kincaid Reading Ease Score        |                    |                     |                       | <b>&lt;0.001</b> |
| Median (Range)                           | 57.8 (27.5, 96.2)  | 41.0 (9.3, 77.9)    | -13.4 (-53.5, 31.4)   |                  |
| Mean (SD)                                | 57.1 (12.0)        | 42.9 (12.4)         | -14.3 (14.4)          |                  |
| Flesch-Kincaid Reading Level (Numerical) |                    |                     |                       | <b>&lt;0.001</b> |
| Median (Range)                           | 5.0 (1.0, 7.0)     | 6.0 (3.0, 7.0)      | 1.0 (-2.0, 5.0)       |                  |
| Mean (SD)                                | 4.8 (1.1)          | 5.7 (0.8)           | 1.0 (1.2)             |                  |
| Hemingway Grade level (#)                |                    |                     |                       | <b>&lt;0.001</b> |
| Median (Range)                           | 8.0 (1.0, 17.0)    | 11.0 (5.0, 17.0)    | 3.0 (-5.0, 16.0)      |                  |
| Mean (SD)                                | 8.3 (2.2)          | 11.7 (3.0)          | 3.4 (3.3)             |                  |
| Hemingway # Words counts                 |                    |                     |                       | <b>&lt;0.001</b> |
| Median (Range)                           | 66.5 (15.0, 487.0) | 289.0 (45.0, 577.0) | 219.0 (-434.0, 475.0) |                  |
| Mean (SD)                                | 72.9 (41.4)        | 280.7 (120.5)       | 207.8 (114.4)         |                  |

|                                                    | Verbal (N=242)   | Written (N=242)    | Difference (N=242) | P value          |
|----------------------------------------------------|------------------|--------------------|--------------------|------------------|
| Hemingway # Sentences counts                       |                  |                    |                    | <b>&lt;0.001</b> |
| Median (Range)                                     | 5.0 (1.0, 17.0)  | 18.0 (2.0, 61.0)   | 12.0 (-3.0, 54.0)  |                  |
| Mean (SD)                                          | 5.0 (2.1)        | 18.1 (11.0)        | 13.1 (10.7)        |                  |
| word.per.sentence                                  |                  |                    |                    | <b>&lt;0.001</b> |
| Median (Range)                                     | 14.0 (7.5, 97.4) | 16.3 (6.5, 89.3)   | 2.5 (-89.8, 78.2)  |                  |
| Mean (SD)                                          | 14.7 (6.1)       | 18.1 (7.7)         | 3.5 (10.2)         |                  |
| Hemingway Reading Time (S)                         |                  |                    |                    | <b>&lt;0.001</b> |
| Median (Range)                                     | 16.0 (3.0, 61.0) | 68.5 (10.0, 138.0) | 52.0 (-5.0, 114.0) |                  |
| Mean (SD)                                          | 16.8 (7.7)       | 67.0 (29.0)        | 50.2 (25.9)        |                  |
| Accuracy                                           |                  |                    |                    | <b>&lt;0.001</b> |
| Accuracy=No                                        | 120 (49.6%)      | 74 (30.6%)         | 52 (43.3%)         |                  |
| Accuracy=Yes                                       | 122 (50.4%)      | 168 (69.4%)        | 6 (4.9%)           |                  |
| Avg. Likert.scale.by4                              |                  |                    |                    | <b>&lt;0.001</b> |
| Median (Range)                                     | 1.2 (1.0, 3.0)   | 2.0 (1.0, 3.0)     | 0.1 (-1.2, 2.0)    |                  |
| Mean (SD)                                          | 1.7 (0.7)        | 2.0 (0.8)          | 0.4 (0.6)          |                  |
| overall.Likert                                     |                  |                    |                    | <b>&lt;0.001</b> |
| 1=Incorrect by all reviewers                       | 103 (42.6%)      | 61 (25.2%)         | 47 (45.6%)         |                  |
| 2=Not correct/completely correct by some reviewers | 108 (44.6%)      | 124 (51.2%)        | 28 (25.9%)         |                  |
| 3=Correct by all reviewers                         | 31 (12.8%)       | 57 (23.6%)         | 5 (16.1%)          |                  |

**Table S2A. Accuracy vs. knowledge gap and complexity in ChatGPT-4 answers to verbal questions**

|                             | Accuracy=No (N=120) | Accuracy=Yes (N=122) | Total (N=242)   | P value          |
|-----------------------------|---------------------|----------------------|-----------------|------------------|
| Knowledge Gap Queries       |                     |                      |                 | <b>&lt;0.001</b> |
| 0                           | 64 (53.3%)          | 122 (100.0%)         | 186 (76.9%)     |                  |
| 1                           | 5 (4.2%)            | 0 (0.0%)             | 5 (2.1%)        |                  |
| 2                           | 7 (5.8%)            | 0 (0.0%)             | 7 (2.9%)        |                  |
| 3                           | 42 (35.0%)          | 0 (0.0%)             | 42 (17.4%)      |                  |
| 4                           | 2 (1.7%)            | 0 (0.0%)             | 2 (0.8%)        |                  |
| Flesch-Kincaid Grade Level: |                     |                      |                 | <b>&lt;0.001</b> |
| Median (Range)              | 8.0 (2.1, 18.1)     | 9.4 (5.4, 13.2)      | 8.8 (2.1, 18.1) |                  |

|                                          | Accuracy=No (N=120) | Accuracy=Yes (N=122) | Total (N=242)      | P value          |
|------------------------------------------|---------------------|----------------------|--------------------|------------------|
| Mean (SD)                                | 8.3 (2.2)           | 9.4 (1.6)            | 8.8 (2.0)          |                  |
| Flesch-Kincaid Reading Ease Score        |                     |                      |                    | <b>&lt;0.001</b> |
| Median (Range)                           | 61.1 (27.5, 96.2)   | 54.0 (30.5, 80.6)    | 57.8 (27.5, 96.2)  |                  |
| Mean (SD)                                | 60.5 (12.7)         | 53.8 (10.2)          | 57.1 (12.0)        |                  |
| Flesch-Kincaid Reading Level (Numerical) |                     |                      |                    | <b>&lt;0.001</b> |
| Median (Range)                           | 4.0 (1.0, 7.0)      | 5.0 (2.0, 6.0)       | 5.0 (1.0, 7.0)     |                  |
| Mean (SD)                                | 4.5 (1.2)           | 5.0 (0.9)            | 4.8 (1.1)          |                  |
| Hemingway Grade level (#)                |                     |                      |                    | <b>&lt;0.001</b> |
| Median (Range)                           | 8.0 (1.0, 17.0)     | 9.0 (4.0, 15.0)      | 8.0 (1.0, 17.0)    |                  |
| Mean (SD)                                | 7.7 (2.4)           | 9.0 (1.8)            | 8.3 (2.2)          |                  |
| Hemingway # Words counts                 |                     |                      |                    | <b>&lt;0.001</b> |
| Median (Range)                           | 58.5 (15.0, 487.0)  | 75.0 (29.0, 200.0)   | 66.5 (15.0, 487.0) |                  |
| Mean (SD)                                | 69.7 (53.0)         | 76.1 (25.2)          | 72.9 (41.4)        |                  |
| Hemingway # Sentences counts             |                     |                      |                    | <b>&lt;0.001</b> |
| Median (Range)                           | 4.0 (1.0, 17.0)     | 5.0 (3.0, 12.0)      | 5.0 (1.0, 17.0)    |                  |
| Mean (SD)                                | 4.8 (2.5)           | 5.2 (1.6)            | 5.0 (2.1)          |                  |
| word.per.sent                            |                     |                      |                    | <b>0.021</b>     |
| Median (Range)                           | 13.5 (7.5, 97.4)    | 14.6 (9.7, 24.2)     | 14.0 (7.5, 97.4)   |                  |
| Mean (SD)                                | 14.6 (8.3)          | 14.7 (2.5)           | 14.7 (6.1)         |                  |
| Hemingway Reading Time (S)               |                     |                      |                    | <b>&lt;0.001</b> |
| Median (Range)                           | 14.0 (3.0, 61.0)    | 18.0 (6.0, 48.0)     | 16.0 (3.0, 61.0)   |                  |
| Mean (SD)                                | 15.7 (8.9)          | 18.0 (6.1)           | 16.8 (7.7)         |                  |

**Table S2B. Accuracy vs. knowledge gap and complexity in ChatGPT-4 answers to written questions**

|                       | Accuracy=No (N=74) | Accuracy=Yes (N=168) | Total (N=242) | P value          |
|-----------------------|--------------------|----------------------|---------------|------------------|
| Knowledge Gap Queries |                    |                      |               | <b>&lt;0.001</b> |
| 0                     | 27 (36.5%)         | 168 (100.0%)         | 195 (80.6%)   |                  |
| 2                     | 11 (14.9%)         | 0 (0.0%)             | 11 (4.5%)     |                  |
| 3                     | 33 (44.6%)         | 0 (0.0%)             | 33 (13.6%)    |                  |
| 4                     | 3 (4.1%)           | 0 (0.0%)             | 3 (1.2%)      |                  |

|                                          | Accuracy=No (N=74)  | Accuracy=Yes (N=168) | Total (N=242)       | P value          |
|------------------------------------------|---------------------|----------------------|---------------------|------------------|
| Flesch-Kincaid Grade Level:              |                     |                      |                     | 0.82             |
| Median (Range)                           | 10.4 (4.9, 18.3)    | 11.0 (5.3, 16.6)     | 10.9 (4.9, 18.3)    |                  |
| Mean (SD)                                | 10.8 (2.7)          | 10.8 (1.9)           | 10.8 (2.2)          |                  |
| Flesch-Kincaid Reading Ease Score        |                     |                      |                     | <b>0.015</b>     |
| Median (Range)                           | 43.6 (19.3, 77.9)   | 40.2 (9.3, 71.7)     | 41.0 (9.3, 77.9)    |                  |
| Mean (SD)                                | 45.8 (13.0)         | 41.5 (12.0)          | 42.9 (12.4)         |                  |
| Flesch-Kincaid Reading Level (Numerical) |                     |                      |                     | 0.13             |
| Median (Range)                           | 6.0 (3.0, 7.0)      | 6.0 (3.0, 7.0)       | 6.0 (3.0, 7.0)      |                  |
| Mean (SD)                                | 5.5 (0.9)           | 5.8 (0.7)            | 5.7 (0.8)           |                  |
| Hemingway Grade level (#)                |                     |                      |                     | 0.98             |
| Median (Range)                           | 12.0 (5.0, 17.0)    | 11.0 (6.0, 17.0)     | 11.0 (5.0, 17.0)    |                  |
| Mean (SD)                                | 11.6 (3.3)          | 11.8 (2.9)           | 11.7 (3.0)          |                  |
| Hemingway # Words counts                 |                     |                      |                     | <b>&lt;0.001</b> |
| Median (Range)                           | 187.0 (45.0, 513.0) | 302.5 (108.0, 577.0) | 289.0 (45.0, 577.0) |                  |
| Mean (SD)                                | 215.0 (145.0)       | 309.7 (94.8)         | 280.7 (120.5)       |                  |
| Hemingway # Sentences counts             |                     |                      |                     | <b>&lt;0.001</b> |
| Median (Range)                           | 8.0 (2.0, 45.0)     | 19.0 (3.0, 61.0)     | 18.0 (2.0, 61.0)    |                  |
| Mean (SD)                                | 13.1 (11.3)         | 20.3 (10.1)          | 18.1 (11.0)         |                  |
| word.per.sent                            |                     |                      |                     | <b>0.040</b>     |
| Median (Range)                           | 18.3 (7.6, 40.7)    | 15.7 (6.5, 89.3)     | 16.3 (6.5, 89.3)    |                  |
| Mean (SD)                                | 19.0 (6.3)          | 17.7 (8.2)           | 18.1 (7.7)          |                  |
| Hemingway Reading Time (S)               |                     |                      |                     | <b>&lt;0.001</b> |
| Median (Range)                           | 43.5 (10.0, 123.0)  | 72.5 (26.0, 138.0)   | 68.5 (10.0, 138.0)  |                  |
| Mean (SD)                                | 51.0 (34.7)         | 74.1 (22.7)          | 67.0 (29.0)         |                  |

**Table S3A. Overall Likert scale vs. knowledge gap and complexity in ChatGPT-4 answers to verbal questions**

|                       | 1=Incorrect by all reviewers (N=103) | 2=Not correct/completely correct by some reviewers (N=108) | 3=Correct by all reviewers (N=31) | Total (N=242) | P value          |
|-----------------------|--------------------------------------|------------------------------------------------------------|-----------------------------------|---------------|------------------|
| Knowledge Gap Queries |                                      |                                                            |                                   |               | <b>&lt;0.001</b> |

|                                          | 1=Incorrect by all<br>reviewers (N=103) | 2=Not correct/completely correct by some<br>reviewers (N=108) | 3=Correct by all<br>reviewers (N=31) | Total<br>(N=242)   | P<br>value       |
|------------------------------------------|-----------------------------------------|---------------------------------------------------------------|--------------------------------------|--------------------|------------------|
| 0                                        | 48 (46.6%)                              | 107 (99.1%)                                                   | 31 (100.0%)                          | 186 (76.9%)        |                  |
| 1                                        | 5 (4.9%)                                | 0 (0.0%)                                                      | 0 (0.0%)                             | 5 (2.1%)           |                  |
| 2                                        | 7 (6.8%)                                | 0 (0.0%)                                                      | 0 (0.0%)                             | 7 (2.9%)           |                  |
| 3                                        | 42 (40.8%)                              | 0 (0.0%)                                                      | 0 (0.0%)                             | 42 (17.4%)         |                  |
| 4                                        | 1 (1.0%)                                | 1 (0.9%)                                                      | 0 (0.0%)                             | 2 (0.8%)           |                  |
| Flesch-Kincaid Grade Level:              |                                         |                                                               |                                      |                    | <b>&lt;0.001</b> |
| Median (Range)                           | 7.8 (2.1, 18.1)                         | 9.4 (5.4, 14.0)                                               | 10.0 (7.2, 12.8)                     | 8.8 (2.1, 18.1)    |                  |
| Mean (SD)                                | 8.1 (2.1)                               | 9.3 (1.7)                                                     | 9.8 (1.7)                            | 8.8 (2.0)          |                  |
| Flesch-Kincaid Reading Ease Score        |                                         |                                                               |                                      |                    | <b>&lt;0.001</b> |
| Median (Range)                           | 61.8 (27.5, 96.2)                       | 54.3 (28.8, 77.0)                                             | 55.9 (37.1, 72.2)                    | 57.8 (27.5, 96.2)  |                  |
| Mean (SD)                                | 61.5 (12.6)                             | 54.1 (10.6)                                                   | 53.4 (9.9)                           | 57.1 (12.0)        |                  |
| Flesch-Kincaid Reading Level (Numerical) |                                         |                                                               |                                      |                    | <b>&lt;0.001</b> |
| Median (Range)                           | 4.0 (1.0, 7.0)                          | 5.0 (3.0, 7.0)                                                | 5.0 (3.0, 6.0)                       | 5.0 (1.0, 7.0)     |                  |
| Mean (SD)                                | 4.4 (1.2)                               | 5.0 (1.0)                                                     | 5.1 (0.9)                            | 4.8 (1.1)          |                  |
| Hemingway Grade level (#)                |                                         |                                                               |                                      |                    | <b>&lt;0.001</b> |
| Median (Range)                           | 7.0 (1.0, 17.0)                         | 9.0 (4.0, 14.0)                                               | 10.0 (7.0, 15.0)                     | 8.0 (1.0, 17.0)    |                  |
| Mean (SD)                                | 7.4 (2.3)                               | 8.8 (1.8)                                                     | 9.7 (2.0)                            | 8.3 (2.2)          |                  |
| Hemingway # Words counts                 |                                         |                                                               |                                      |                    | <b>&lt;0.001</b> |
| Median (Range)                           | 53.0 (15.0, 487.0)                      | 72.5 (29.0, 200.0)                                            | 86.0 (42.0, 149.0)                   | 66.5 (15.0, 487.0) |                  |
| Mean (SD)                                | 67.2 (56.3)                             | 74.8 (23.9)                                                   | 85.2 (26.1)                          | 72.9 (41.4)        |                  |
| Hemingway # Sentences counts             |                                         |                                                               |                                      |                    | <b>&lt;0.001</b> |
| Median (Range)                           | 4.0 (1.0, 17.0)                         | 5.0 (3.0, 12.0)                                               | 5.0 (3.0, 11.0)                      | 5.0 (1.0, 17.0)    |                  |
| Mean (SD)                                | 4.7 (2.7)                               | 5.2 (1.5)                                                     | 5.4 (1.8)                            | 5.0 (2.1)          |                  |
| word.per.sent                            |                                         |                                                               |                                      |                    | <b>&lt;0.001</b> |
| Median (Range)                           | 13.2 (7.5, 97.4)                        | 14.2 (9.7, 21.2)                                              | 15.8 (11.8, 24.2)                    | 14.0 (7.5, 97.4)   |                  |
| Mean (SD)                                | 14.5 (8.9)                              | 14.4 (2.5)                                                    | 16.0 (2.6)                           | 14.7 (6.1)         |                  |

|                            | 1=Incorrect by all<br>reviewers (N=103) | 2=Not correct/completely correct by some<br>reviewers (N=108) | 3=Correct by all<br>reviewers (N=31) | Total<br>(N=242) | P<br>value       |
|----------------------------|-----------------------------------------|---------------------------------------------------------------|--------------------------------------|------------------|------------------|
| Hemingway Reading Time (S) |                                         |                                                               |                                      |                  | <b>&lt;0.001</b> |
| Median (Range)             | 12.0 (3.0, 61.0)                        | 17.0 (6.0, 48.0)                                              | 20.0 (10.0, 35.0)                    | 16.0 (3.0, 61.0) |                  |
| Mean (SD)                  | 15.0 (9.2)                              | 17.7 (5.9)                                                    | 20.0 (6.2)                           | 16.8 (7.7)       |                  |

**Table S3B. Overall Likert scale vs. knowledge gap and complexity in ChatGPT-4 answers to written questions**

|                                          | 1=Incorrect by all<br>reviewers (N=61) | 2=Not correct/completely correct by some<br>reviewers (N=124) | 3=Correct by all<br>reviewers (N=57) | Total (N=242)    | P<br>value       |
|------------------------------------------|----------------------------------------|---------------------------------------------------------------|--------------------------------------|------------------|------------------|
| Knowledge Gap Queries                    |                                        |                                                               |                                      |                  | <b>&lt;0.001</b> |
| 0                                        | 15 (24.6%)                             | 123 (99.2%)                                                   | 57 (100.0%)                          | 195 (80.6%)      |                  |
| 2                                        | 11 (18.0%)                             | 0 (0.0%)                                                      | 0 (0.0%)                             | 11 (4.5%)        |                  |
| 3                                        | 32 (52.5%)                             | 1 (0.8%)                                                      | 0 (0.0%)                             | 33 (13.6%)       |                  |
| 4                                        | 3 (4.9%)                               | 0 (0.0%)                                                      | 0 (0.0%)                             | 3 (1.2%)         |                  |
| Flesch-Kincaid Grade Level:              |                                        |                                                               |                                      |                  | 0.68             |
| Median (Range)                           | 10.7 (4.9, 18.3)                       | 10.9 (6.8, 16.6)                                              | 11.0 (5.3, 14.7)                     | 10.9 (4.9, 18.3) |                  |
| Mean (SD)                                | 10.9 (2.9)                             | 10.7 (1.9)                                                    | 10.9 (1.8)                           | 10.8 (2.2)       |                  |
| Flesch-Kincaid Reading Ease Score        |                                        |                                                               |                                      |                  | <b>0.025</b>     |
| Median (Range)                           | 43.4 (19.3, 77.9)                      | 41.1 (17.0, 67.8)                                             | 38.3 (9.3, 71.7)                     | 41.0 (9.3, 77.9) |                  |
| Mean (SD)                                | 46.1 (13.6)                            | 42.6 (11.6)                                                   | 39.8 (12.2)                          | 42.9 (12.4)      |                  |
| Flesch-Kincaid Reading Level (Numerical) |                                        |                                                               |                                      |                  | 0.056            |
| Median (Range)                           | 6.0 (3.0, 7.0)                         | 6.0 (4.0, 7.0)                                                | 6.0 (3.0, 7.0)                       | 6.0 (3.0, 7.0)   |                  |
| Mean (SD)                                | 5.5 (1.0)                              | 5.7 (0.7)                                                     | 5.9 (0.7)                            | 5.7 (0.8)        |                  |
| Hemingway Grade level (#)                |                                        |                                                               |                                      |                  | 0.31             |
| Median (Range)                           | 11.0 (5.0, 17.0)                       | 11.0 (6.0, 17.0)                                              | 12.0 (6.0, 17.0)                     | 11.0 (5.0, 17.0) |                  |
| Mean (SD)                                | 11.1 (3.3)                             | 11.8 (3.0)                                                    | 12.0 (2.6)                           | 11.7 (3.0)       |                  |

|                                 | 1=Incorrect by all<br>reviewers (N=61) | 2=Not correct/completely correct by some<br>reviewers (N=124) | 3=Correct by all<br>reviewers (N=57) | Total (N=242)          | P<br>value       |
|---------------------------------|----------------------------------------|---------------------------------------------------------------|--------------------------------------|------------------------|------------------|
| Hemingway # Words counts        |                                        |                                                               |                                      |                        | <b>&lt;0.001</b> |
| Median (Range)                  | 132.0 (45.0, 513.0)                    | 289.0 (99.0, 577.0)                                           | 332.0 (172.0, 506.0)                 | 289.0 (45.0,<br>577.0) |                  |
| Mean (SD)                       | 195.3 (144.9)                          | 294.2 (97.0)                                                  | 342.7 (84.1)                         | 280.7 (120.5)          |                  |
| Hemingway # Sentences<br>counts |                                        |                                                               |                                      |                        | <b>&lt;0.001</b> |
| Median (Range)                  | 7.0 (2.0, 45.0)                        | 18.0 (3.0, 54.0)                                              | 21.0 (9.0, 61.0)                     | 18.0 (2.0,<br>61.0)    |                  |
| Mean (SD)                       | 12.8 (12.1)                            | 18.8 (9.7)                                                    | 22.3 (10.4)                          | 18.1 (11.0)            |                  |
| word.per.sent                   |                                        |                                                               |                                      |                        | 0.62             |
| Median (Range)                  | 17.5 (7.6, 32.5)                       | 16.1 (7.4, 89.3)                                              | 15.8 (6.5, 26.9)                     | 16.3 (6.5,<br>89.3)    |                  |
| Mean (SD)                       | 18.1 (5.6)                             | 18.6 (9.3)                                                    | 17.0 (5.3)                           | 18.1 (7.7)             |                  |
| Hemingway Reading Time (S)      |                                        |                                                               |                                      |                        | <b>&lt;0.001</b> |
| Median (Range)                  | 37.0 (10.0, 123.0)                     | 68.5 (11.0, 138.0)                                            | 79.0 (41.0, 121.0)                   | 68.5 (10.0,<br>138.0)  |                  |
| Mean (SD)                       | 47.2 (34.5)                            | 69.9 (23.8)                                                   | 82.1 (20.2)                          | 67.0 (29.0)            |                  |

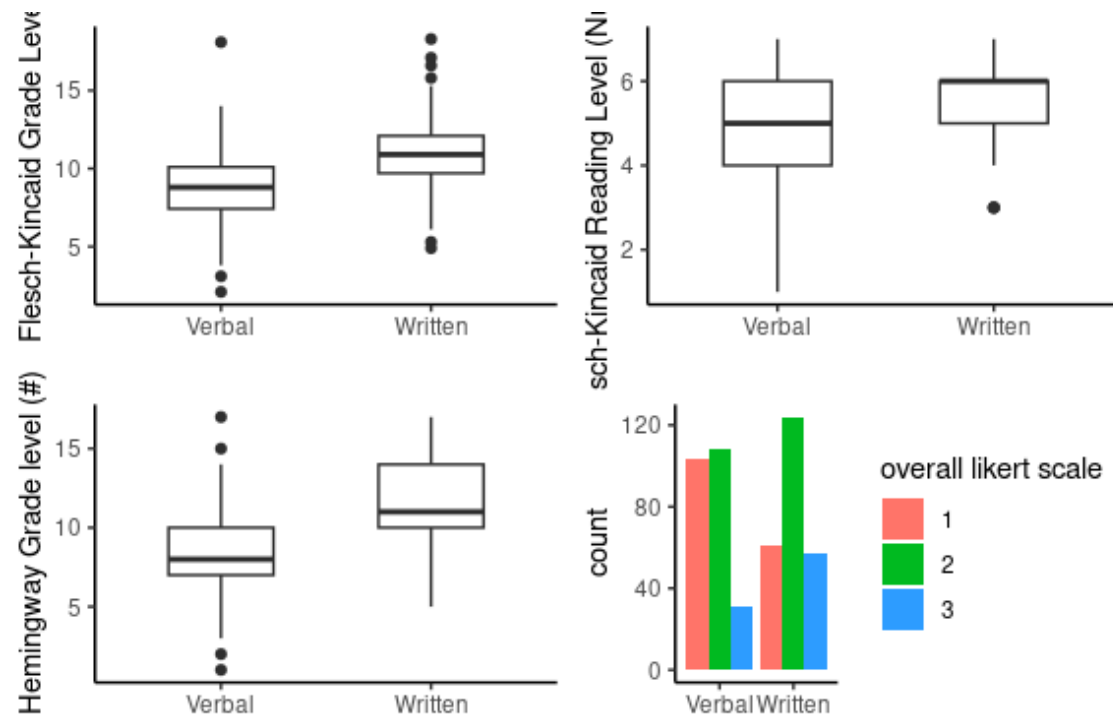

**Figure S1. Evaluation of ChatGPT-4 answers to written and verbal questions**



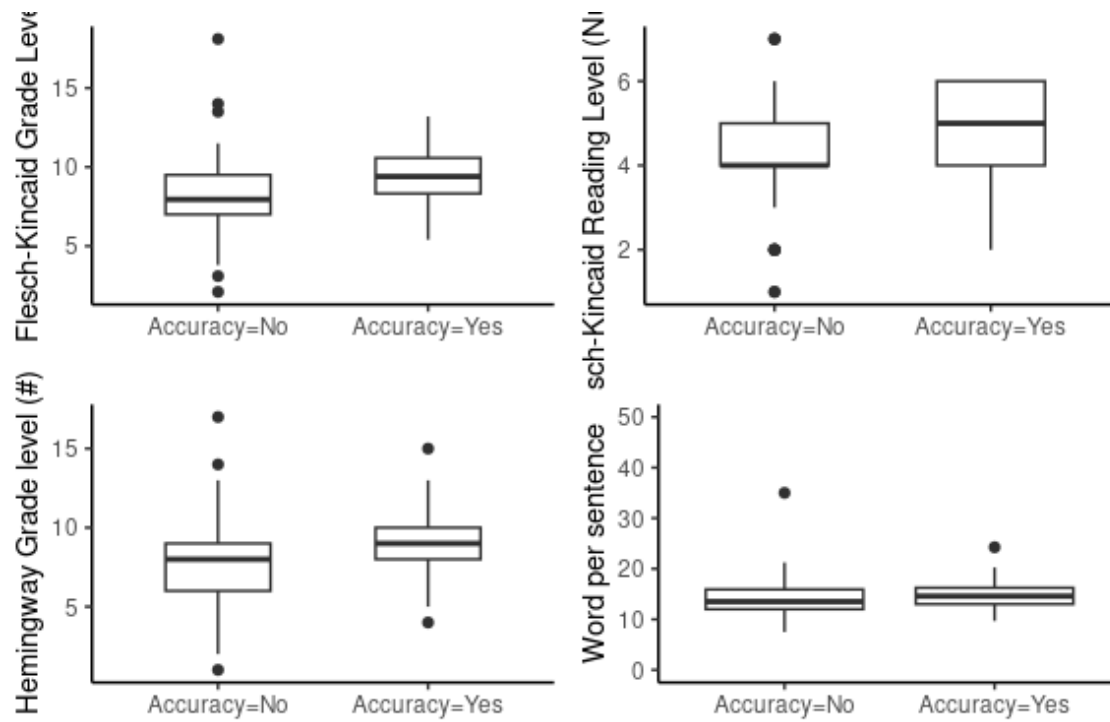

**Figure S2A. Accuracy vs. complexity in ChatGPT-4 answers to verbal questions (extreme values may not show in the plots)**

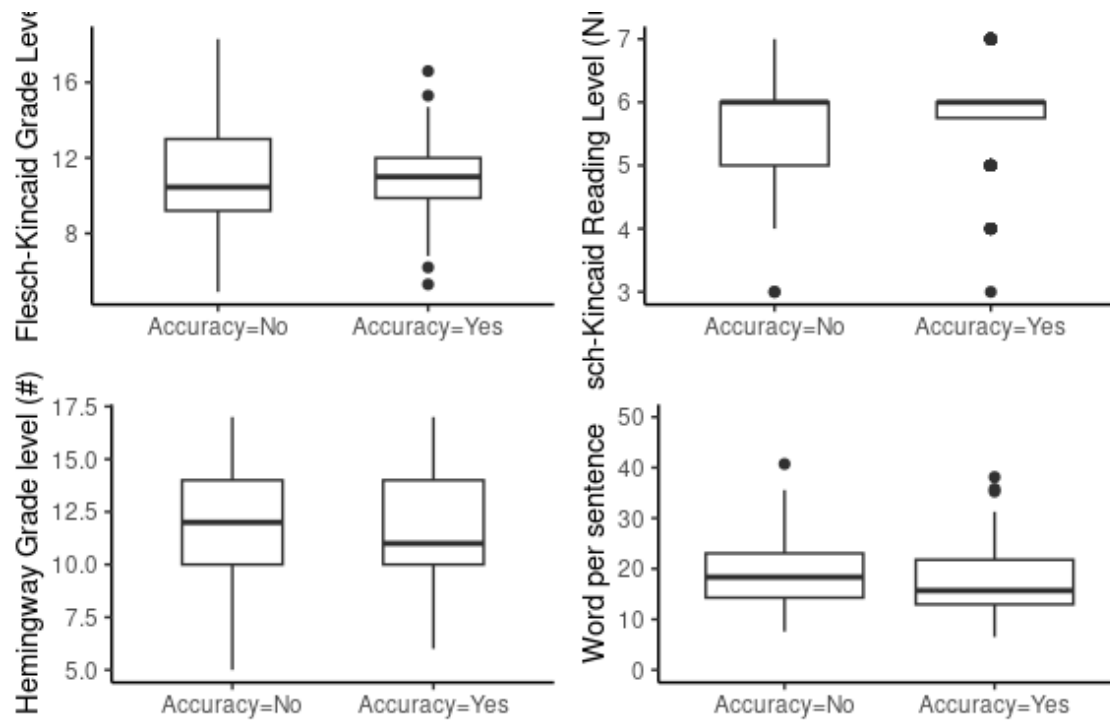

**Figure S2B. Accuracy vs. complexity in ChatGPT-4 answers to written questions (extreme values may not show in the plots)**

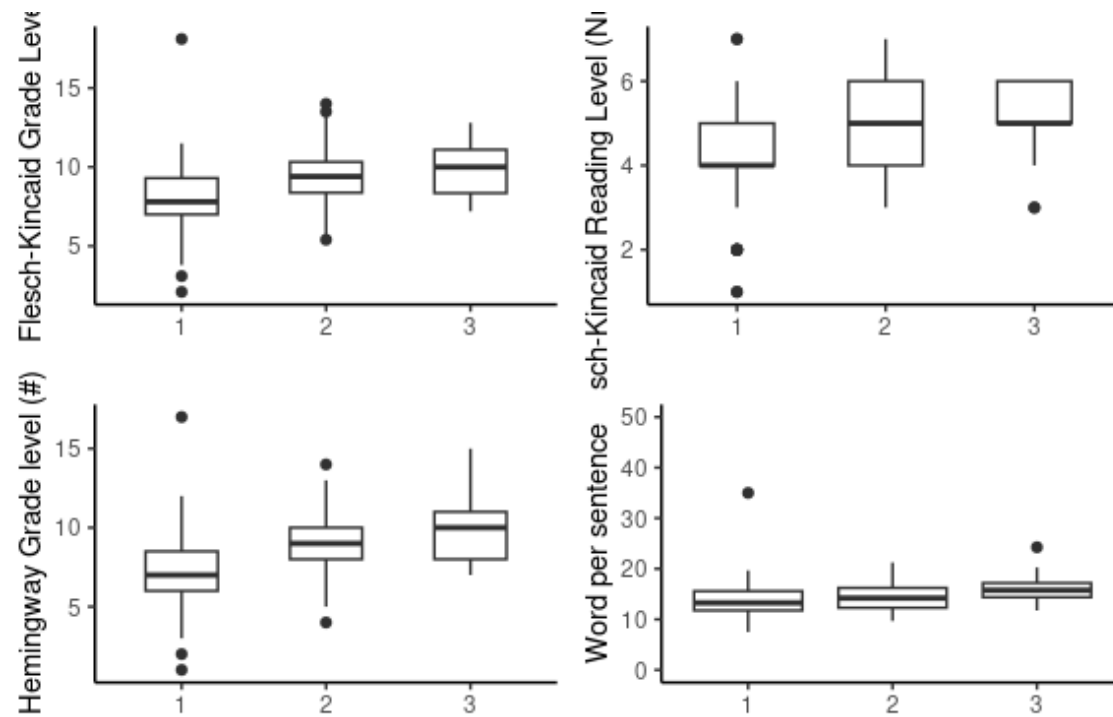

**Figure S3A. Overall Likert scale vs. complexity in ChatGPT answers to verbal questions (extreme values may not show in the plots)**

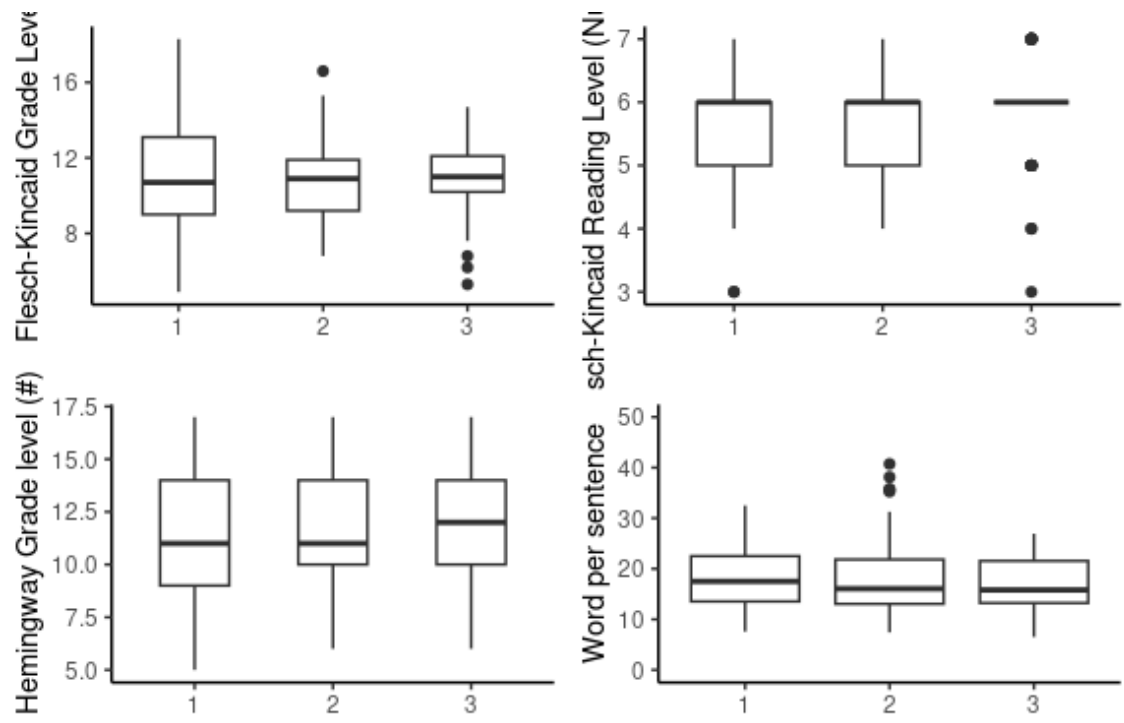

**Figure S3B. Overall Likert scale vs. complexity in ChatGPT-4 answers to written questions (extreme values may not show in the plots)**

**Table S4A. Evaluation of AIVA answers and ChatGPT-4 answers to written questions based on the average score of same 10 topics**

|                    | AIVA (N=10)    | chatGPT written (N=10) | Total (N=20)   | P value          |
|--------------------|----------------|------------------------|----------------|------------------|
| mean.accuracy      |                |                        |                | <b>0.014</b>     |
| Median (Range)     | 0.9 (0.6, 1.0) | 0.7 (0.5, 0.9)         | 0.8 (0.5, 1.0) |                  |
| Mean (SD)          | 0.9 (0.1)      | 0.7 (0.1)              | 0.8 (0.1)      |                  |
| mean.knowledge.gap |                |                        |                | <b>0.048</b>     |
| Median (Range)     | 0.1 (0.0, 0.1) | 0.1 (0.0, 0.5)         | 0.1 (0.0, 0.5) |                  |
| Mean (SD)          | 0.1 (0.0)      | 0.2 (0.2)              | 0.1 (0.1)      |                  |
| mean.likert        |                |                        |                | <b>&lt;0.001</b> |
| Median (Range)     | 3.0 (2.7, 3.0) | 2.1 (1.5, 2.5)         | 2.6 (1.5, 3.0) |                  |
| Mean (SD)          | 2.9 (0.1)      | 2.0 (0.3)              | 2.5 (0.5)      |                  |

**Table S4B. Evaluation of AIVA answers and ChatGPT-4 answers to verbal questions based on the average score of same 10 topics**

|                    | AIVA (N=10)    | chatGPT verbal (N=10) | Total (N=20)   | P value          |
|--------------------|----------------|-----------------------|----------------|------------------|
| mean.accuracy      |                |                       |                | <b>0.001</b>     |
| Median (Range)     | 0.9 (0.6, 1.0) | 0.6 (0.2, 0.8)        | 0.7 (0.2, 1.0) |                  |
| Mean (SD)          | 0.9 (0.1)      | 0.5 (0.2)             | 0.7 (0.2)      |                  |
| mean.knowledge.gap |                |                       |                | <b>0.028</b>     |
| Median (Range)     | 0.1 (0.0, 0.1) | 0.2 (0.0, 0.6)        | 0.1 (0.0, 0.6) |                  |
| Mean (SD)          | 0.1 (0.0)      | 0.2 (0.2)             | 0.1 (0.2)      |                  |
| mean.likert        |                |                       |                | <b>&lt;0.001</b> |
| Median (Range)     | 3.0 (2.7, 3.0) | 1.6 (1.2, 2.4)        | 2.6 (1.2, 3.0) |                  |
| Mean (SD)          | 2.9 (0.1)      | 1.6 (0.4)             | 2.3 (0.7)      |                  |

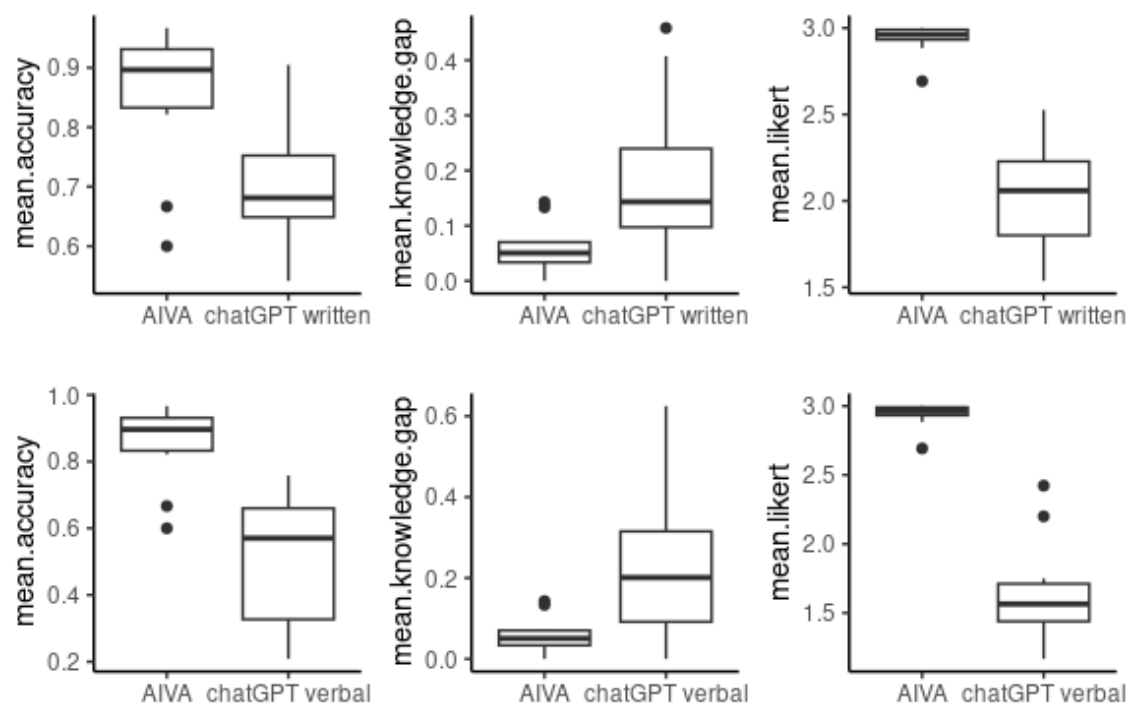

**Figure S4. Evaluation of AIVA answers and ChatGPT-4 answers**

**Table S5A. Evaluation of BARD answers and ChatGPT-4 answers to written questions based on the average score of same 10 topics**

|                        | BARD (N=10)       | chatGPT written (N=10) | Total (N=20)      | P value      |
|------------------------|-------------------|------------------------|-------------------|--------------|
| mean.accuracy          |                   |                        |                   | 0.21         |
| Median (Range)         | 0.6 (0.2, 0.9)    | 0.7 (0.5, 0.9)         | 0.7 (0.2, 0.9)    |              |
| Mean (SD)              | 0.5 (0.2)         | 0.7 (0.1)              | 0.6 (0.2)         |              |
| mean.knowledge.gap     |                   |                        |                   | <b>0.015</b> |
| Median (Range)         | 0.4 (0.0, 0.7)    | 0.1 (0.0, 0.5)         | 0.3 (0.0, 0.7)    |              |
| Mean (SD)              | 0.4 (0.2)         | 0.2 (0.2)              | 0.3 (0.2)         |              |
| mean.likert            |                   |                        |                   | 0.50         |
| Median (Range)         | 1.9 (1.3, 2.5)    | 2.1 (1.5, 2.5)         | 1.9 (1.3, 2.5)    |              |
| Mean (SD)              | 1.9 (0.4)         | 2.0 (0.3)              | 2.0 (0.3)         |              |
| mean.FK.grade.level    |                   |                        |                   | <b>0.003</b> |
| Median (Range)         | 8.9 (7.1, 9.6)    | 11.0 (8.7, 13.8)       | 9.3 (7.1, 13.8)   |              |
| Mean (SD)              | 8.5 (1.0)         | 11.0 (1.6)             | 9.8 (1.8)         |              |
| mean.FK.reading.score  |                   |                        |                   | <b>0.007</b> |
| Median (Range)         | 55.7 (51.5, 70.0) | 40.6 (29.8, 57.8)      | 52.7 (29.8, 70.0) |              |
| Mean (SD)              | 57.9 (6.7)        | 42.3 (9.8)             | 50.1 (11.4)       |              |
| mean.FK.reading.level  |                   |                        |                   | <b>0.008</b> |
| Median (Range)         | 4.9 (3.5, 5.4)    | 5.9 (4.7, 6.3)         | 5.2 (3.5, 6.3)    |              |
| Mean (SD)              | 4.7 (0.6)         | 5.7 (0.6)              | 5.2 (0.8)         |              |
| mean.HW.reading.level  |                   |                        |                   | <b>0.007</b> |
| Median (Range)         | 9.4 (7.7, 12.1)   | 14.4 (8.8, 38.9)       | 11.0 (7.7, 38.9)  |              |
| Mean (SD)              | 9.6 (1.5)         | 16.9 (8.8)             | 13.2 (7.2)        |              |
| mean.word.per.sentence |                   |                        |                   | 0.88         |
| Median (Range)         | 17.3 (12.8, 22.2) | 17.2 (11.8, 24.2)      | 17.3 (11.8, 24.2) |              |
| Mean (SD)              | 17.9 (2.9)        | 17.9 (4.1)             | 17.9 (3.5)        |              |

**Table S5B. Evaluation of BARD answers and ChatGPT-4 answers to verbal questions based on the average score of same 10 topics**

|                        | BARD (N=10)       | chatGPT verbal (N=10) | Total (N=20)      | P value      |
|------------------------|-------------------|-----------------------|-------------------|--------------|
| mean.accuracy          |                   |                       |                   | 0.65         |
| Median (Range)         | 0.6 (0.2, 0.9)    | 0.6 (0.2, 0.8)        | 0.6 (0.2, 0.9)    |              |
| Mean (SD)              | 0.5 (0.2)         | 0.5 (0.2)             | 0.5 (0.2)         |              |
| mean.knowledge.gap     |                   |                       |                   | 0.069        |
| Median (Range)         | 0.4 (0.0, 0.7)    | 0.2 (0.0, 0.6)        | 0.3 (0.0, 0.7)    |              |
| Mean (SD)              | 0.4 (0.2)         | 0.2 (0.2)             | 0.3 (0.2)         |              |
| mean.likert            |                   |                       |                   | 0.059        |
| Median (Range)         | 1.9 (1.3, 2.5)    | 1.6 (1.2, 2.4)        | 1.6 (1.2, 2.5)    |              |
| Mean (SD)              | 1.9 (0.4)         | 1.6 (0.4)             | 1.8 (0.4)         |              |
| mean.FK.grade.level    |                   |                       |                   | 0.65         |
| Median (Range)         | 8.9 (7.1, 9.6)    | 8.7 (8.2, 11.5)       | 8.8 (7.1, 11.5)   |              |
| Mean (SD)              | 8.5 (1.0)         | 9.0 (1.0)             | 8.8 (1.0)         |              |
| mean.FK.reading.score  |                   |                       |                   | 0.76         |
| Median (Range)         | 55.7 (51.5, 70.0) | 57.4 (37.7, 60.9)     | 57.4 (37.7, 70.0) |              |
| Mean (SD)              | 57.9 (6.7)        | 55.5 (6.7)            | 56.7 (6.6)        |              |
| mean.FK.reading.level  |                   |                       |                   | 0.79         |
| Median (Range)         | 4.9 (3.5, 5.4)    | 4.8 (4.4, 6.3)        | 4.8 (3.5, 6.3)    |              |
| Mean (SD)              | 4.7 (0.6)         | 4.9 (0.6)             | 4.8 (0.6)         |              |
| mean.HW.reading.level  |                   |                       |                   | 0.23         |
| Median (Range)         | 9.4 (7.7, 12.1)   | 8.3 (7.4, 11.6)       | 8.6 (7.4, 12.1)   |              |
| Mean (SD)              | 9.6 (1.5)         | 8.9 (1.4)             | 9.2 (1.4)         |              |
| mean.word.per.sentence |                   |                       |                   | <b>0.004</b> |
| Median (Range)         | 17.3 (12.8, 22.2) | 14.2 (13.0, 16.8)     | 15.7 (12.8, 22.2) |              |
| Mean (SD)              | 17.9 (2.9)        | 14.6 (1.2)            | 16.2 (2.8)        |              |



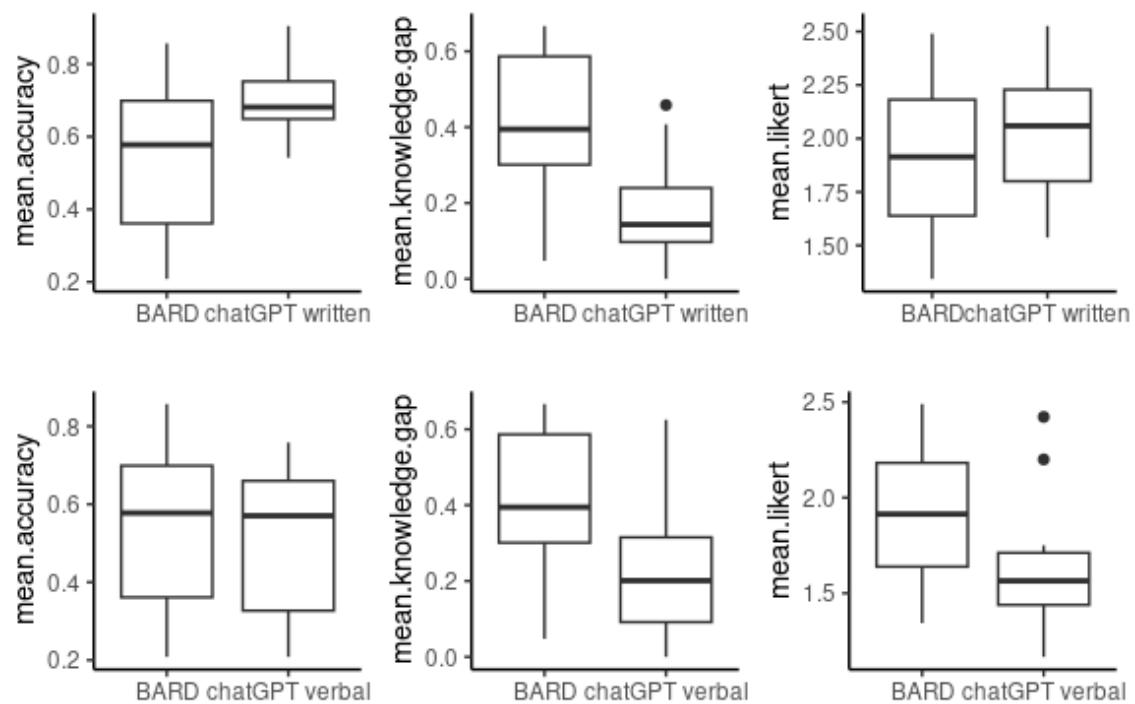

**Figure S5. Evaluation of BARD answers and ChatGPT-4 answers**

**Table S6. Evaluation of AIVA answers and BARD answers based on the average score of same 10 topics**

|                    | AIVA (N=10)    | BARD (N=10)    | Total (N=20)   | P value          |
|--------------------|----------------|----------------|----------------|------------------|
| mean.accuracy      |                |                |                | <b>0.002</b>     |
| Median (Range)     | 0.9 (0.6, 1.0) | 0.6 (0.2, 0.9) | 0.8 (0.2, 1.0) |                  |
| Mean (SD)          | 0.9 (0.1)      | 0.5 (0.2)      | 0.7 (0.2)      |                  |
| mean.knowledge.gap |                |                |                | <b>&lt;0.001</b> |
| Median (Range)     | 0.1 (0.0, 0.1) | 0.4 (0.0, 0.7) | 0.1 (0.0, 0.7) |                  |
| Mean (SD)          | 0.1 (0.0)      | 0.4 (0.2)      | 0.2 (0.2)      |                  |
| mean.likert        |                |                |                | <b>&lt;0.001</b> |
| Median (Range)     | 3.0 (2.7, 3.0) | 1.9 (1.3, 2.5) | 2.6 (1.3, 3.0) |                  |
| Mean (SD)          | 2.9 (0.1)      | 1.9 (0.4)      | 2.4 (0.6)      |                  |

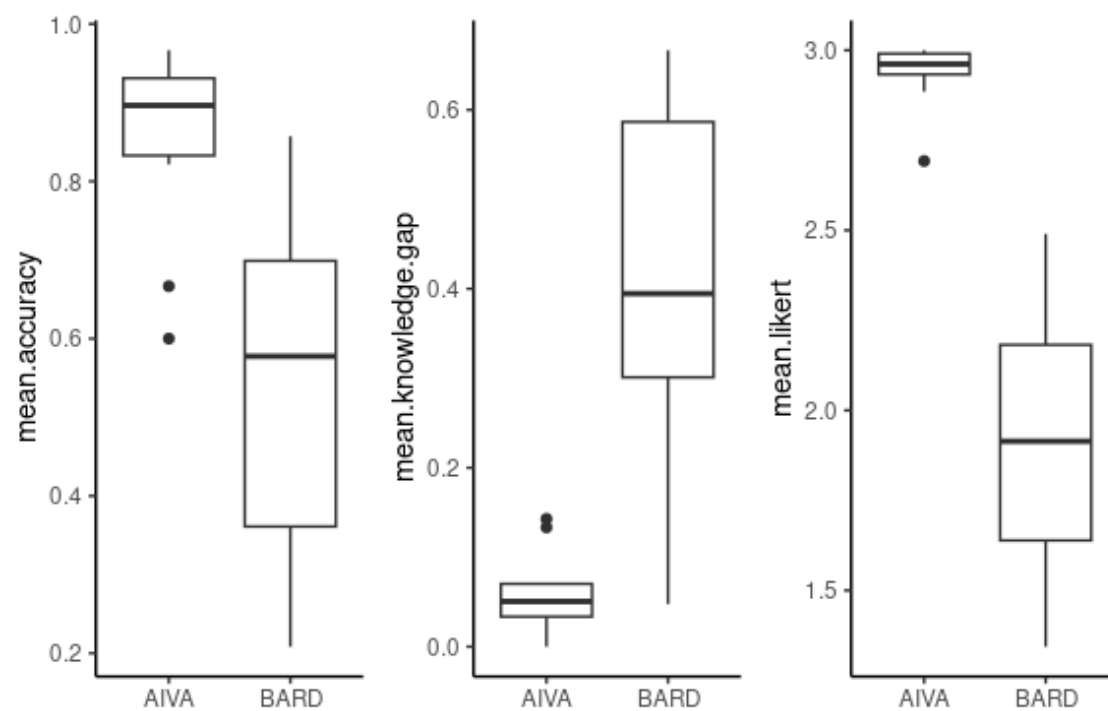

**Figure S6. Evaluation of AIVA and BARD answers**
